# Supplementary material
Source: publisher site journal article supplement (https://www.spandidos-publications.com/1988/downloadSupplementary)
Supplement: Supplementary file 1 [file downloadSupplementary]

Figure S1. Characterization of GBM cell lines and PARP-1 inhibition by NU1025. (A) Representative protein expression of PTEN, AKT, pAKT<sup>(476)</sup> and MGMT in GBM cell lines (T98G, LN18 and U87MG). HeLa cells were used as a positive control for PTEN expression;  $\beta$ -actin was used as an endogenous control. The samples were analyzed by western blot analysis. (B) Effects of NU1025 agent in the reduction of poly-ADP-ribosylation promoted by PARP-1. Cells were treated with NU1025 (NU-100 and NU-200  $\mu$ M) at 20 min prior to H<sub>2</sub>O<sub>2</sub> treatment (20 mM for 10 min), and then analyzed by flow cytometry using PAR-antibody. \*P<0.05. Bars correspond to comparisons between treatments. GBM, glioblastoma; PARP-1, poly[ADP-ribose] polymerase 1; PTEN, phosphatase and tensin homologue deleted on chromosome ten; MGMT, O<sup>6</sup>-methylguanine DNA methyltransferase.

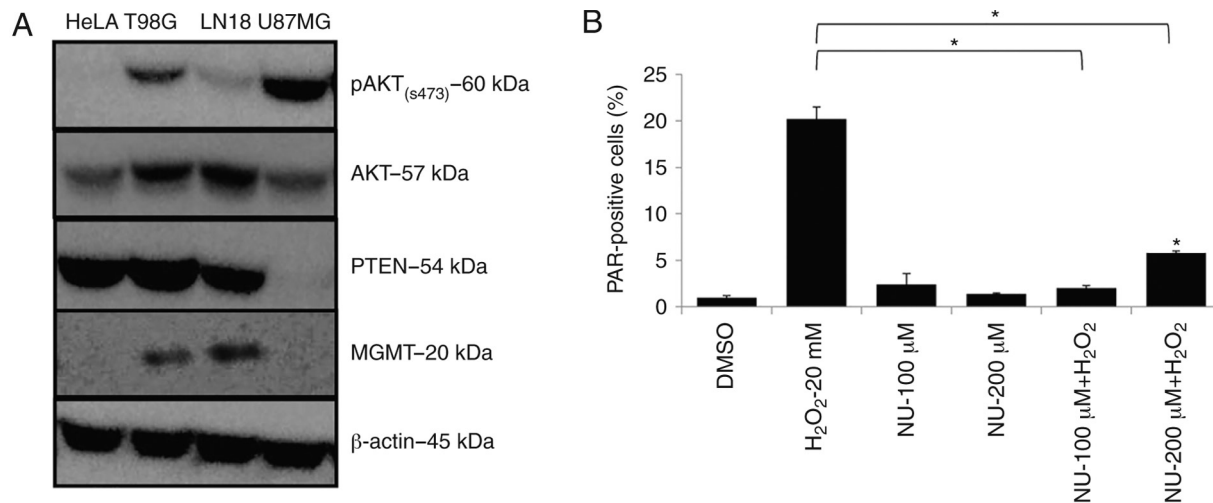

Table SI. List of genes used in expression analysis<sup>a</sup>.

| Custom genes TaqMan Array 96 - Well FAST |                |
|------------------------------------------|----------------|
| Genes                                    | Identification |
| <i>TBP</i>                               | Hs00427620_m1  |
| <i>HPRT1</i>                             | Hs99999909_m1  |
| <i>MGMT</i>                              | Hs01037698_m1  |
| <i>BRCA1</i>                             | Hs01556193_m1  |
| <i>BRCA2</i>                             | Hs01037414_m1  |
| <i>LIG4</i>                              | Hs00172455_m1  |
| <i>RAD51B</i>                            | Hs00172522_m1  |
| <i>RAD51C</i>                            | Hs00427442_m1  |
| <i>RAD51D</i>                            | Hs00979544_m1  |
| <i>RAD51</i>                             | Hs00153418_m1  |
| <i>FEN1</i>                              | Hs00748727_s1  |
| <i>APEX1</i>                             | Hs00172396_m1  |
| <i>LIG1</i>                              | Hs01553527_m1  |
| <i>PARP1</i>                             | Hs00242302_m1  |
| <i>XRCC1</i>                             | Hs00959834_m1  |
| <i>MSH2</i>                              | Hs00953523_m1  |
| <i>MSH3</i>                              | Hs00989003_m1  |
| <i>XPA</i>                               | Hs00166045_m1  |
| <i>XPC</i>                               | Hs01104206_m1  |
| <i>XRCC4</i>                             | Hs00243327_m1  |
| <i>PRKDC</i>                             | Hs00179161_m1  |
| <i>XRCC6</i>                             | Hs01922652_g1  |
| <i>XRCC5</i>                             | Hs00221707_m1  |

<sup>a</sup>as evaluated by means of custom TaqMan Array 96 - Well FAST plates (Thermo Fischer Scientific, Inc.).

Table SII. Fold change values (log2) evaluated by PCR array (Thermo Fisher Scientific, Inc.) for a set of DNA repair pathway genes in T98G cells submitted to continuous treatments of TMZ (200  $\mu$ M) and NU1025 (200  $\mu$ M), tested alone or in combination.

| T98G cells-Transcript expression values (fold change log2) |                    |                          |                   |              |                           |                   |             |
|------------------------------------------------------------|--------------------|--------------------------|-------------------|--------------|---------------------------|-------------------|-------------|
| Genes                                                      | DNA repair pathway | Time of treatments (6 h) |                   |              | Time of treatments (24 h) |                   |             |
|                                                            |                    | NU1025 (200 $\mu$ M)     | TMZ (200 $\mu$ M) | NU1025 +TMZ  | NU1025 (200 $\mu$ M)      | TMZ (200 $\mu$ M) | NU1025 +TMZ |
| <i>PARP1</i>                                               | BER                | 0.17                     | 0.10              | 0.38         | 0.31                      | <b>1.30</b>       | -0.06       |
| <i>APEX1</i>                                               |                    | 0.05                     | 0.20              | 0.50         | -0.36                     | 0.34              | -0.18       |
| <i>FEN1</i>                                                |                    | -0.61                    | -0.83             | -0.92        | 0.05                      | <b>1.43</b>       | -0.53       |
| <i>LIG1</i>                                                |                    | 0.39                     | 0.20              | 1.28         | -0.11                     | <b>1.90</b>       | <b>1.47</b> |
| <i>XRCC1</i>                                               |                    | 0.37                     | 0.16              | 0.17         | -0.52                     | 0.86              | -0.46       |
| <i>BRCA1</i>                                               | HR                 | -0.06                    | 1.52              | 0.31         | 1.18                      | <b>1.32</b>       | 0.31        |
| <i>RAD51</i>                                               |                    | 0.97                     | 0.20              | 0.65         | 0.60                      | 1.16              | 0.02        |
| <i>RAD51B</i>                                              |                    | 0.49                     | -0.20             | -0.21        | -0.28                     | <b>1.63</b>       | 0.88        |
| <i>RAD51C</i>                                              |                    | 0.21                     | -0.02             | -0.76        | 0.73                      | <b>1.68</b>       | 0.89        |
| <i>RAD51D</i>                                              |                    | 0.52                     | 0.27              | 0.57         | -0.51                     | 0.49              | -0.06       |
| <i>LIG4</i>                                                |                    | <b>-1.98</b>             | <b>-2.13</b>      | <b>-1.42</b> | 0.07                      | 0.93              | -0.69       |
| <i>PRKDC</i>                                               | NHEJ               | 0.61                     | 0.03              | 0.30         | -0.32                     | <b>1.37</b>       | 0.37        |
| <i>XRCC5</i>                                               |                    | 0.35                     | -0.44             | 0.46         | 0.56                      | 0.43              | -0.14       |
| <i>XRCC6</i>                                               |                    | 0.31                     | -0.11             | 0.53         | -0.27                     | 0.02              | -0.45       |
| <i>XPA</i>                                                 | NER                | 0.45                     | 0.20              | 0.0          | 0.10                      | 0.51              | -0.40       |
| <i>XPC</i>                                                 |                    | <b>-1.94</b>             | <b>-1.60</b>      | -1.28        | -0.58                     | -0.01             | -1.01       |
| <i>XRCC4</i>                                               |                    | 0.27                     | 0.20              | 0.40         | 0.13                      | <b>1.31</b>       | 0.47        |
| <i>MGMT</i>                                                | MGMT               | -0.61                    | <b>-1.38</b>      | -1.01        | -0.13                     | 1.03              | 0.81        |
| <i>MSH2</i>                                                | MMR                | 0.34                     | 0.36              | 0.38         | 0.03                      | 1.05              | 0.26        |
| <i>MSH3</i>                                                |                    | -0.04                    | -0.24             | -0.09        | 0.13                      | 0.51              | -0.28       |

The expression was evaluated 6 and 24 h after the start of the treatments using QuantStudio 3 Real-Time PCR Systems and software (Thermo Fisher Scientific, Inc.). *TBP* and *HPRT1* were used as reference genes. The experiments were performed with a pool of cDNA corresponding to the proportional junction of three independent experiments applied in simplicates. Fold change values >|1.3| are represented in bold. BER, base excision repair; HR, homologous recombination; NHEJ, non-homologous end joining; NER, nucleotide excision repair; MGMT, O<sup>6</sup>-methylguanine DNA methyltransferase; MMR, mismatch repair.

Table SIII. Fold change values (log2) evaluated by PCR array (Thermo Fisher Scientific, Inc.) for a set of DNA repair pathway genes in LN18 cells submitted to continuous treatments of TMZ (200  $\mu$ M) and NU1025 (200  $\mu$ M), tested alone or in combination.

| LN18 cells-Transcript expression values (fold change log2) |                    |                          |                   |             |                           |                   |              |
|------------------------------------------------------------|--------------------|--------------------------|-------------------|-------------|---------------------------|-------------------|--------------|
| Genes                                                      | DNA repair pathway | Time of treatments (6 h) |                   |             | Time of treatments (24 h) |                   |              |
|                                                            |                    | NU1025 (200 $\mu$ M)     | TMZ (200 $\mu$ M) | NU1025 +TMZ | NU1025 (200 $\mu$ M)      | TMZ (200 $\mu$ M) | NU1025 +TMZ  |
| <i>PARP1</i>                                               | BER                | -0.16                    | -0.05             | -0.06       | -0.16                     | 0.21              | 0.07         |
| <i>APEX1</i>                                               |                    | 0.11                     | 0.33              | 0.05        | 0.13                      | 0.79              | 0.64         |
| <i>FEN1</i>                                                |                    | 0.16                     | 0.39              | 0.17        | 0.09                      | 0.23              | 0.14         |
| <i>LIG1</i>                                                |                    | -0.16                    | 0.07              | -0.08       | -1.24                     | -0.49             | -1.03        |
| <i>XRCC1</i>                                               |                    | 0.14                     | 0.33              | -0.10       | -0.33                     | -0.11             | 0.22         |
| <i>BRCA1</i>                                               | HR                 | -0.31                    | -0.12             | -0.33       | <b>2.18</b>               | 0.78              | 0.52         |
| <i>RAD51</i>                                               |                    | -0.51                    | 0.01              | -0.16       | 0.35                      | 0.97              | 0.44         |
| <i>RAD51B</i>                                              |                    | -0.18                    | -0.42             | -0.40       | 0.11                      | 0.10              | -0.02        |
| <i>RAD51C</i>                                              |                    | -0.41                    | 0.12              | -0.01       | 0.56                      | 0.67              | 0.27         |
| <i>RAD51D</i>                                              |                    | 0.05                     | 0.09              | 0.10        | 0.45                      | 0.50              | 0.49         |
| <i>LIG4</i>                                                |                    | -0.35                    | -0.42             | -0.10       | -0.94                     | 0.06              | -0.56        |
| <i>PRKDC</i>                                               | NHEJ               | -0.32                    | -0.27             | -0.03       | 0.25                      | -0.11             | 0.25         |
| <i>XRCC5</i>                                               |                    | -0.11                    | 0.05              | -0.01       | 0.01                      | 0.36              | 0.32         |
| <i>XRCC6</i>                                               |                    | -0.02                    | 0.09              | 0.18        | <b>-1.81</b>              | <b>-2.18</b>      | <b>-2.18</b> |
| <i>XPA</i>                                                 | NER                | -0.09                    | 0.00              | 0.18        | -0.39                     | 0.15              | -0.24        |
| <i>XPC</i>                                                 |                    | 0.23                     | 0.47              | 0.18        | 0.11                      | 0.14              | 0.32         |
| <i>XRCC4</i>                                               |                    | 0.01                     | 0.10              | -0.04       | -0.49                     | 0.63              | 0.17         |
| <i>MGMT</i>                                                | MGMT               | 0.40                     | 0.41              | 0.00        | 0.98                      | 1.10              | 0.83         |
| <i>MSH2</i>                                                | MMR                | -0.18                    | 0.09              | 0.09        | -0.05                     | 0.61              | 0.31         |
| <i>MSH3</i>                                                |                    | -0.30                    | -0.25             | -0.20       | 0.97                      | 0.54              | 0.71         |

The expression was evaluated six and 24 h after the start of the treatments using QuantStudio 3 Real-Time PCR Systems and software (Thermo Fisher Scientific). *TBP* and *HPRT1* were used as reference genes. The experiments were performed with a pool of cDNA corresponding to the proportional junction of three independent experiments applied in simplicates. Fold change values >|1.3| are represented in bold. BER, base excision repair; HR, homologous recombination; NHEJ, non-homologous end joining; NER, nucleotide excision repair; MGMT, O<sup>6</sup>-methylguanine DNA methyltransferase; MMR, mismatch repair.
